# Supplementary material for: Global transcript and phenotypic analysis of yeast cells expressing Ssa1, Ssa2, Ssa3 or Ssa4 as sole source of cytosolic Hsp70-Ssa chaperone activity
Source: PubMed Central journal article supplement (PMC4022180; doi:10.1186/1471-2164-15-194), 2014-03-14
Supplement: 12864_2013_7032_MOESM1_ESM.pdf [file 12864_2013_7032_MOESM1_ESM.pdf]

**Table S1: Primers used for RT-qPCR**

| <b>Systematic gene name<sup>a</sup></b> | <b>Primers</b>         | <b>Oligonucleotide</b>                             |
|-----------------------------------------|------------------------|----------------------------------------------------|
| YFL039C                                 | ACT1-F<br>ACT1-R       | GGGTTTGGAAATCTGCC<br>CCACCAATCCAGACGGAG            |
| YBR120C                                 | CBP6-F<br>CBP6-R       | TAATTAACAGAACTTCCGGTCCA<br>TACCGTCAACGGCATTATTAAC  |
| YBR197C                                 | YBR197C-F<br>YBR197C-R | TTCCACCAACAGAAGGAAATCTA<br>GAGTGCATTGTTATACGGCTACC |
| YNL300W                                 | TOS6-F<br>TOS6-R       | CTCTACTCTCTCCACCGTTGCT<br>GTGGTGTTAGCTTGGCTACTGAT  |
| YML027W                                 | YOX1-F<br>YOX1-R       | ATCACCAAGCTTCACTAATCCAA<br>TCGTGTGATTCATCAACTGTTTC |
| YMR199W                                 | CLN1-F<br>CLN1-R       | CTAATCAAGATCAAGGCCCTTTT<br>CTATTGTAGAGGCCAGTTGCAGT |
| YPL256C                                 | CLN2-F<br>CLN2-R       | TATGTGGTAGCACCGTTAGTGTG<br>TCCATGGTTAATGAAGCTTGTCT |
| YHR147C                                 | MRPL6-F<br>MRPL6-R     | TAGGTGTTACTGAGGGGCATCT<br>CTCTGGTGGATGGAATTTTCTC   |
| YBL078C                                 | ATG8-F<br>ATG8-R       | CCGTAGGGCAATTTGTTTATGT<br>ACAAAACCCGTCCTTATCCTT    |
| YDR533C                                 | HSP31-F<br>HSP31-R     | CAAGACCGGTGTTTTTGTGTA<br>AATTTGGTAATCATCGGCATTC    |
| YPR036W                                 | VMA13-F<br>VMA13-R     | CCGTGATACCAGAGTATCGTGA<br>AAACTGGGTAAAGGTCAGCAA    |
| YDR194C                                 | MSS116-F<br>MSS116-R   | ATTAGGTTTGAGCCGTAGTCCA<br>ACGGTTCGTCATCGTAATCTCT   |
| YPL171C                                 | OYE3-F<br>OYE3-R       | TTTAGCCATCCATGATTGTCAG<br>GATAGAATTCTTAGCCGCATGG   |
| YHR094C                                 | HXT1-F<br>HXT1-R       | CCAGCCATGTTTCAACGTACTA<br>GGTCAACGGTGTACAGAGAACA   |
| YNR014W                                 | YNR014W-F<br>YNR014W-R | TCACTACTGCCCTCTTCTAGGC<br>GTACGAGACGGACCTTTTCATC   |

---

**Table S1 continued.....**

| <b>Systematic gene name</b> | <b>Primers</b>         | <b>Oligonucleotide</b>                           |
|-----------------------------|------------------------|--------------------------------------------------|
| YNL108C                     | HUF1-F<br>HUF1-R       | ACCGGTATTGATAACGATGTCC<br>CTCCTACACCACGATCGACATA |
| YCL009C                     | ILV6-F<br>ILV6-R       | AACACCGAGGTCAAAGACCTAA<br>CTGGCCATCACTAGCTCTCTTT |
| YKL089W                     | MIF2-F<br>MIF2-R       | GTAGAAGAGGAGGCTGAGGTGA<br>ATGTCAAGAACGGGTTTATTGG |
| YDR331W                     | GPI8-F<br>GPI8-R       | AGGCTGTTAACGGATAGATGGA<br>TTTTCGTACATTTGCTGGAATG |
| YNL186W                     | UBP10-F<br>UBP10-R     | AAACTTGGGTTCTCCATTAGCA<br>CAGAAATTTTGGAGCTGGAATC |
| YMR214W                     | SCJ1-F<br>SCJ1-R       | TGATCAAGGTCCAGGAAAAACT<br>ACCACACATCTGTTGAATCTGC |
| YHR137W                     | ARO9-F<br>ARO9-R       | ACAGAGAGTCCCAGGGTATTGA<br>TCAACAATGAGGAAATCGTGTC |
| YOR387C                     | YOR387C-F<br>YOR387C-R | ATTGGTGATGCTATGGTTCCTT<br>GGGGTGCTCAAATAACAGAAG  |
| YMR303C                     | ADH2-F<br>ADH2-R       | CATTGTTAGCGCAGTCGTTAAG<br>ACAACGTGGTTGAAGACATCAG |
| YDL182W                     | LYS20-F<br>LYS20-R     | ACTGCTGCTAAACCAAATCCAT<br>ATGTAGTCCACACCGAAATCGT |
| YDR342C                     | HXT7-F<br>HXT7-R       | GGGCTGTTTGGTCTTCATGT<br>ACCTCTTCTGGATGGTGGAA     |

---

Primers were design using the Primer3 software (version 0.4.0; <http://frodo.wi.mit.edu/primer3/>). Primer specificity was confirmed by melting curve analyses of real-time RT-PCR products (81 cycles of 55°C for 30s).

<sup>a</sup>Systematic names and the sequence was used for design of primers were based on *Saccharomyces* Genome Database (<http://www.yeastgenome.org/>).
